# Supplementary material for: Robust determination of differential abundance in shotgun proteomics using nonparametric statistics
Source: Royal Society of Chemistry journal article supplement (doi:10.1039/c8mo00077h), 2018-09-17
Supplement: c8mo00077h1.pdf [file c8mo00077h1.pdf]

Supplementary files

Robust Determination of Differential Abundance in Shotgun  
Proteomics using Nonparametric Tests

P. Slama, M. R. Hoopmann, R. L. Moritz and D. Geman\*.

\*Corresponding author: [geman@cis.jhu.edu](mailto:geman@cis.jhu.edu)

**Supplementary Figure S1.** Performances of CSLog-PI (gray) and CSNorm-PI (white) on different pairs of conditions with less discriminative power when setting the number of discoveries to  $N_D=60$ .

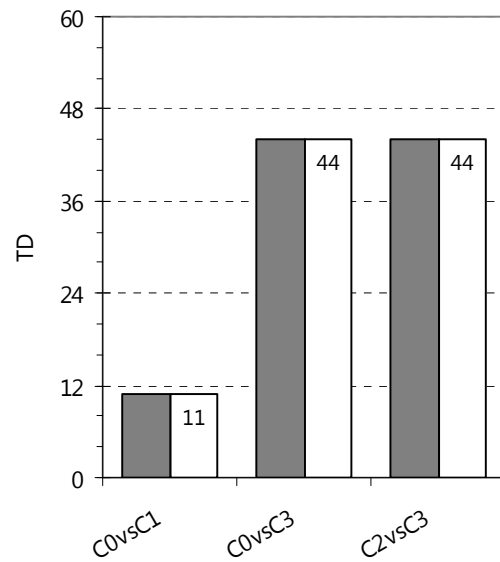

**Supplementary Figure S2.** Number of true discoveries obtained using CSNorm-SC (gray bars) at different numbers of discoveries  $N_D$ . Results obtained on CSNorm-PI (white bars) are shown for comparison.

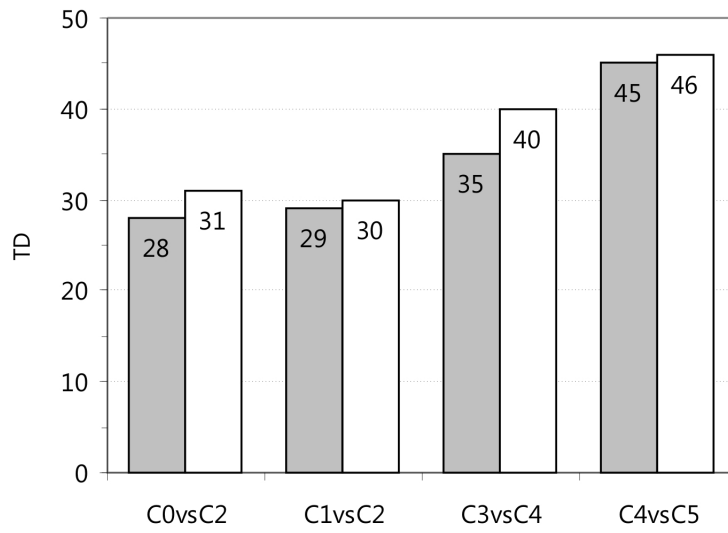

**Supplementary Figure S3.** Number of true discoveries TD obtained using method NSAF (blue bars) for comparisons C0vsC1 (top), C0vsC2 (middle) and C3vsC4 (bottom) at different number of discoveries  $N_D$ .

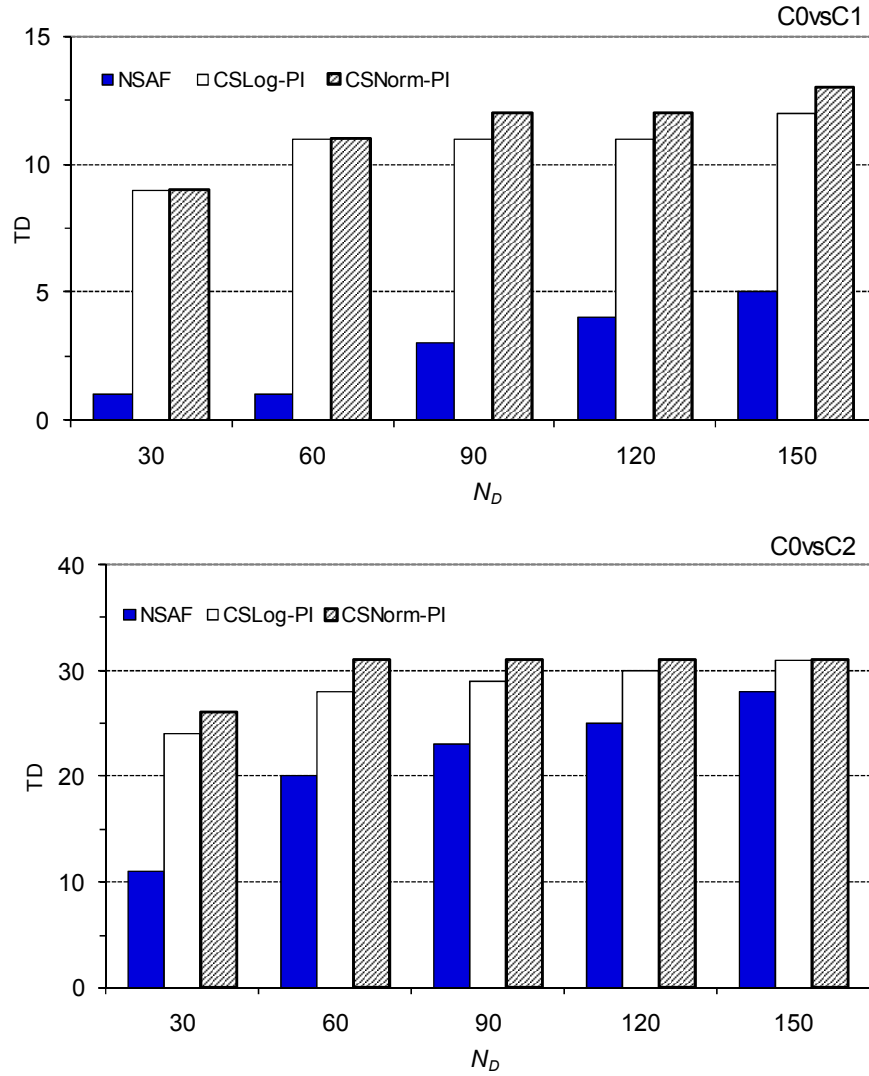

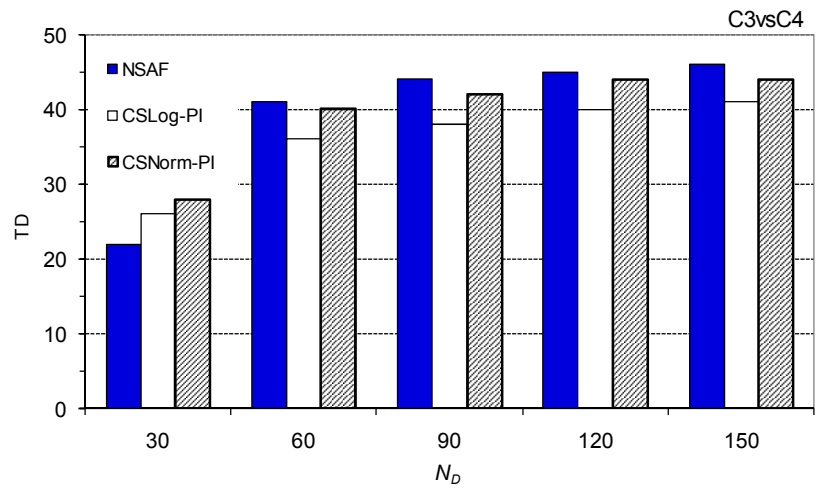

**Supplementary Figure S4.** Average number of null values among detected UPS1 peptides within each condition. Average over peptides + standard deviation is shown.

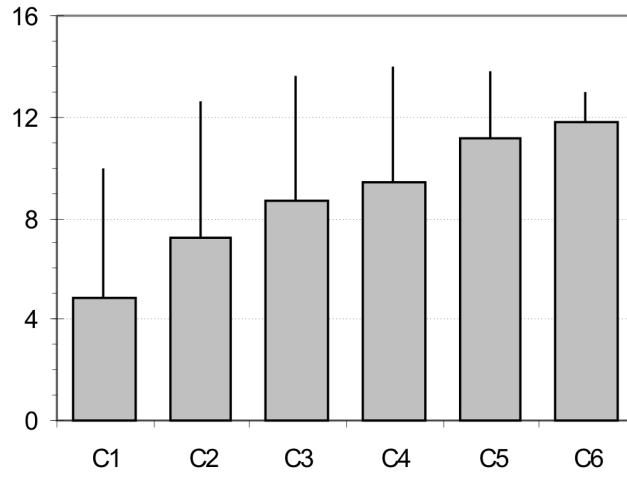

**Supplementary figure S5.** Values ( $\log(\text{PI})$ ) obtained on 16 peptides from 2 UPS1 proteins for spike-in conditions C3 (top) and C5 (bottom). Eight peptides from Serotransferrin precursor protein (P02787; first eight group of bars, left) and eight peptides from Gamma-synuclein (O76070) are displayed. Each group of bars represents the values for the 12 samples of that condition.

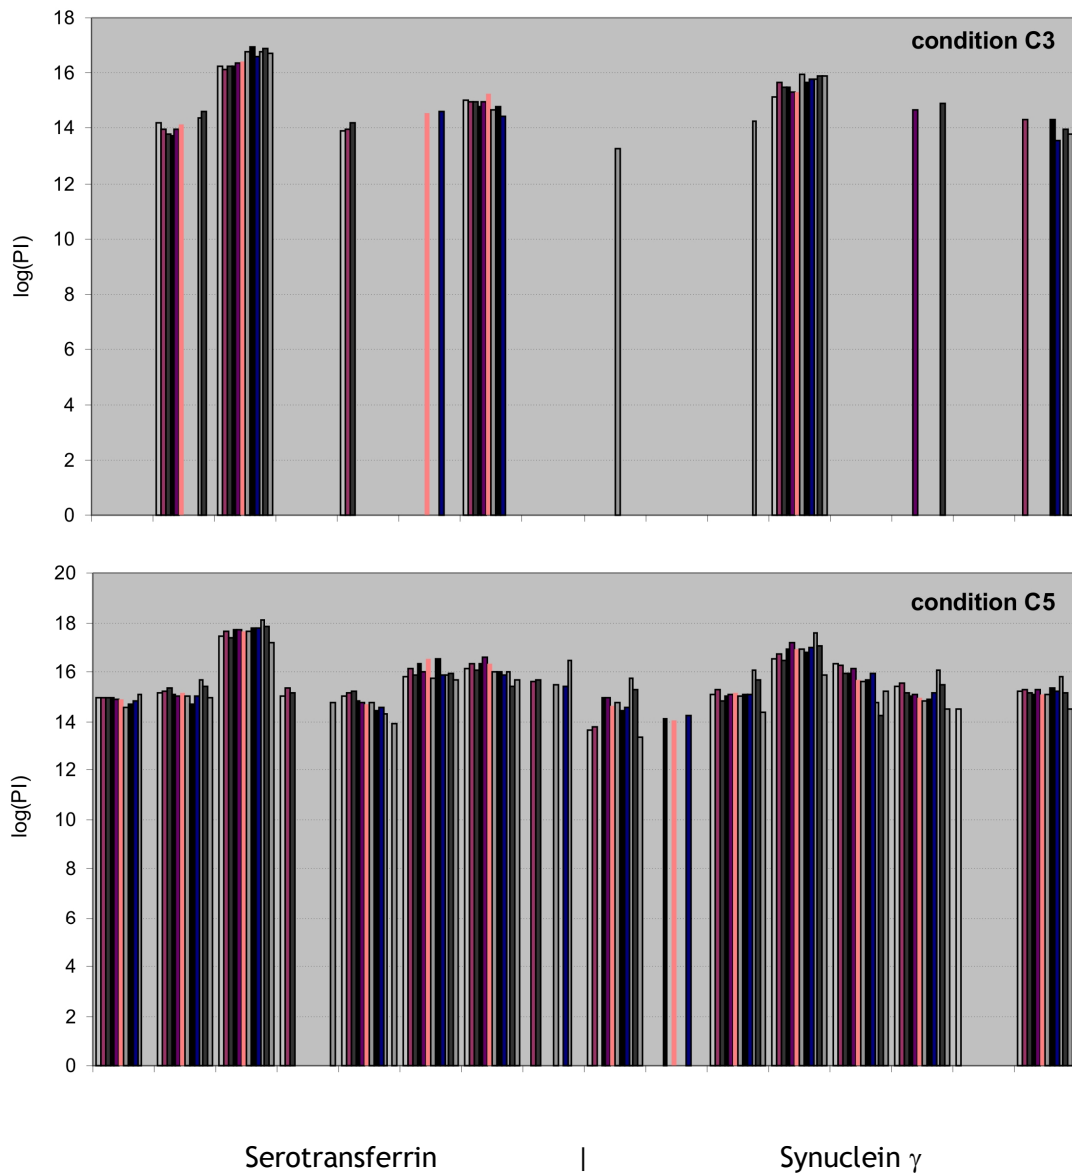

**Supplementary Table S1.** Description of the dataset. Only peptides with single protein assignment are considered (87% of data). Note that 3 signals were assigned to UPS1 peptides in the yeast-only samples.

| Condition | Average number of peptides | Number of observed UPS1 peptides |
|-----------|----------------------------|----------------------------------|
| C0        | 3538                       | 3                                |
| C1        | 3651                       | 45                               |
| C2        | 3337                       | 130                              |
| C3        | 3569                       | 304                              |
| C4        | 3490                       | 362                              |
| C5        | 3749                       | 537                              |
| C6        | 3841                       | 819                              |

- **Additional files :**

All raw mass spectrometry data and database search results are provided for inspection via ProteomeXchange with identifier PXD006447. Summarized PSM results and data matrices used in this analysis are provided in the supplementary zip file.

MATLAB code.
